# Supplementary material for: Single-Molecule Three-Color FRET with Both Negligible Spectral Overlap and Long Observation Time
Source: PubMed Central journal article supplement (PMC2924373; doi:10.1371/journal.pone.0012270), 2010-08-19

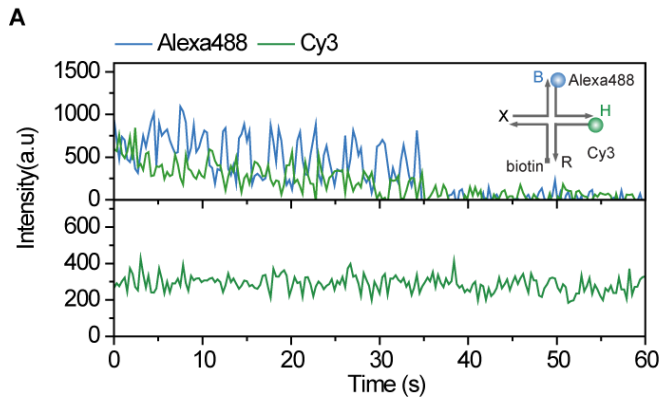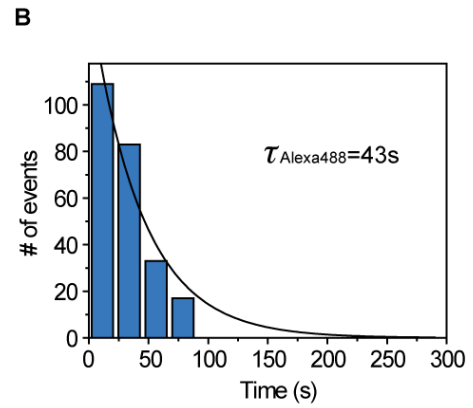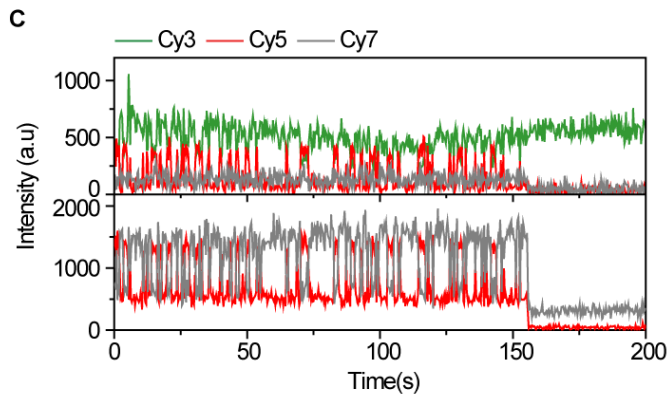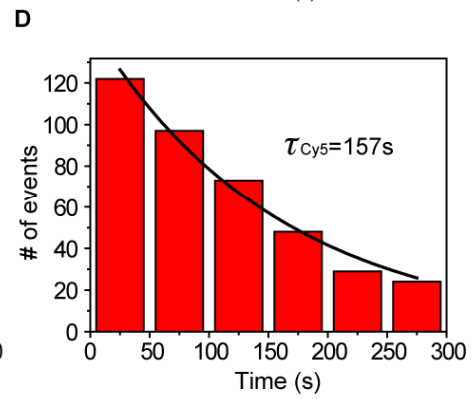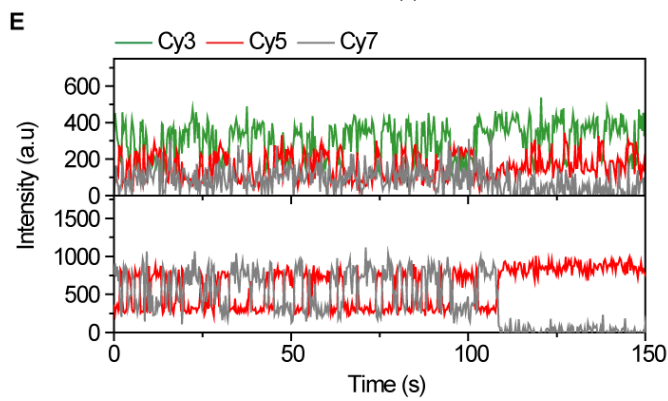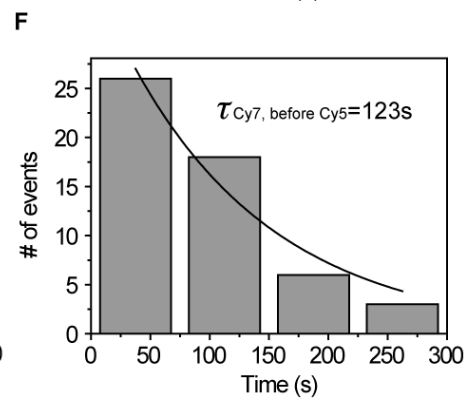

Supplement: pone.0012270.s003.pdf [file pone.0012270.s003.pdf]
